# Supplementary material for: CCN2 inhibits lung cancer metastasis through promoting DAPK-dependent anoikis and inducing EGFR degradation
Source: PubMed Central journal article supplement — Cell Death Differ. 2012 Nov 23;20(3):443–55. doi: 10.1038/cdd.2012.136 (PMC3569983; doi:10.1038/cdd.2012.136), 2012-11-23
Supplement: cdd2012136x2.pdf [file cdd2012136x2.pdf]

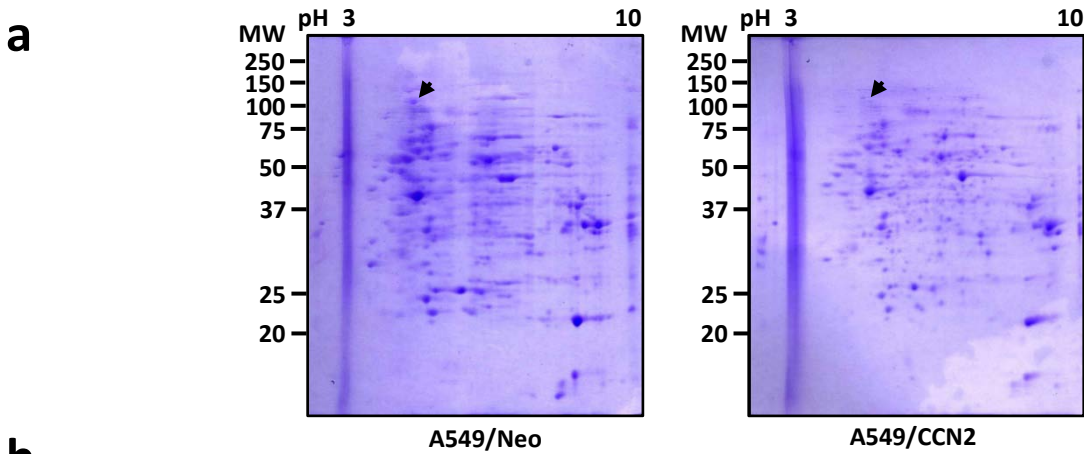

**b**

**Protein View**  
 Match to: **IPI00018274** Score: **153**  
 Tax\_Id=9606 Gene Symbol=Epidermal growth factor receptor (EGFR)  
 Nominal mass (M<sub>r</sub>): **134190**; Calculated pI value: **6.26**

Variable modifications: Carbamidomethyl (C), Deamidated (NQ)  
 Cleavage by Trypsin: cuts C-term side of KR unless next residue is P  
 Sequence Coverage: **9%**

| Start - End | Observed | Mr(expt)  | Mr(calc)  | ppm | Miss Sequence                                                                   |
|-------------|----------|-----------|-----------|-----|---------------------------------------------------------------------------------|
| 38 - 53     | 635.6735 | 1903.9987 | 1903.9792 | 10  | 0 K.LTQLGTFEDHFLSLQR.M ( <a href="#">Ions score 12</a> )                        |
| 99 - 108    | 604.8727 | 1207.7308 | 1207.7288 | 2   | 0 R.IPLENLQIIR.G ( <a href="#">Ions score 30</a> )                              |
| 99 - 108    | 604.8741 | 1207.7336 | 1207.7288 | 4   | 0 R.IPLENLQIIR.G ( <a href="#">Ions score 38</a> )                              |
| 213 - 222   | 596.7868 | 1191.5590 | 1191.5489 | 9   | 0 K.IICAQQCSGR.C 2 Carbamidomethyl (C) ( <a href="#">Ions score 48</a> )        |
| 227 - 244   | 678.9286 | 2033.7640 | 2033.7561 | 4   | 0 K.SPDCCHNQCAAGCTGPR.E 4 Carbamidomethyl (C) ( <a href="#">Ions score 57</a> ) |
| 227 - 244   | 678.9299 | 2033.7679 | 2033.7561 | 6   | 0 K.SPDCCHNQCAAGCTGPR.E 4 Carbamidomethyl (C) ( <a href="#">Ions score 49</a> ) |
| 298 - 309   | 469.5568 | 1405.6486 | 1405.6409 | 5   | 0 R.NYVVTDHGSCVR.A Carbamidomethyl (C) ( <a href="#">Ions score 3</a> )         |
| 378 - 396   | 708.3656 | 2122.0750 | 2122.0583 | 8   | 0 R.GDSFTHTPPLDPQELDILK.T ( <a href="#">Ions score 48</a> )                     |
| 740 - 745   | 320.7241 | 639.4336  | 639.4319  | 3   | 0 K.IPVAIK.E ( <a href="#">Ions score 5</a> )                                   |
| 1100 - 1121 | 600.5688 | 2398.2461 | 2398.2254 | 9   | 0 K.RPAGSVQMPVYHNQPLNPAPSR.D ( <a href="#">Ions score 14</a> )                  |

**Peptide View**

MS/MS Fragmentation of **SPSDCCHNQCAAGCTGPR**

Found in **IPI00018274**, Gene Symbol=EGFR Isoform 1 of Epidermal growth factor receptor  
 Match to Query 4185: 2033.763972 from(678.928600,3+)

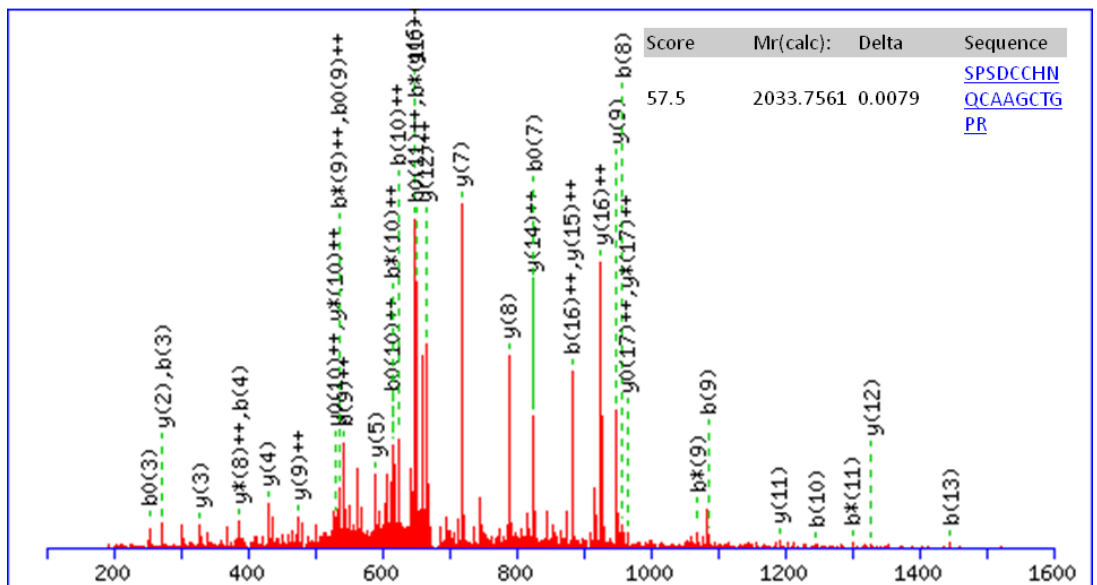

**Figure.S1**

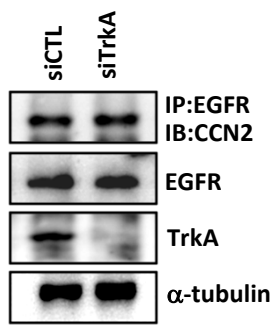

Figure.S2

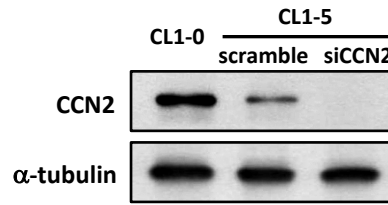

Figure.S3

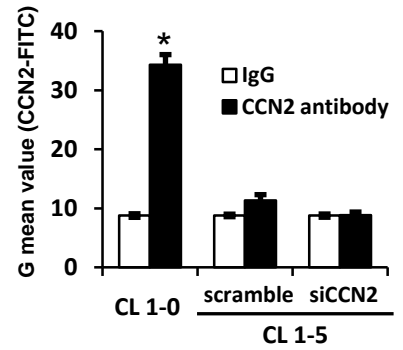

a

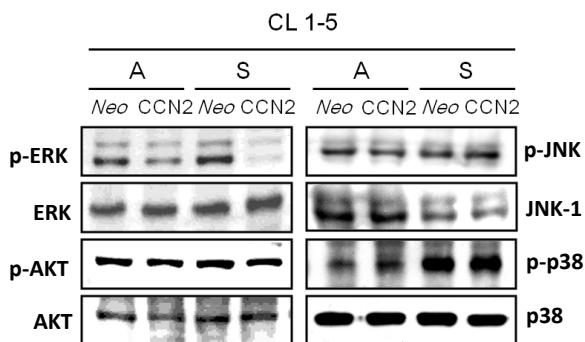

b

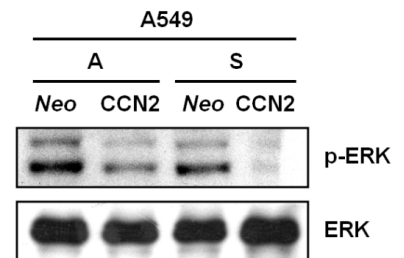

c

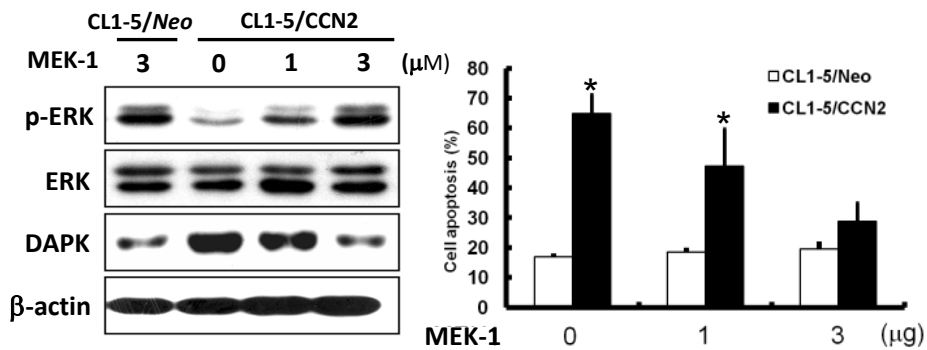

Figure.S4

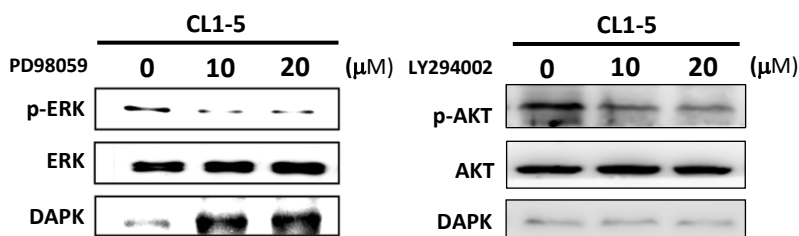

Figure.S5

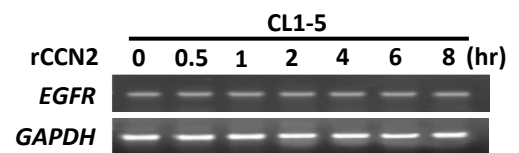

Figure.S6

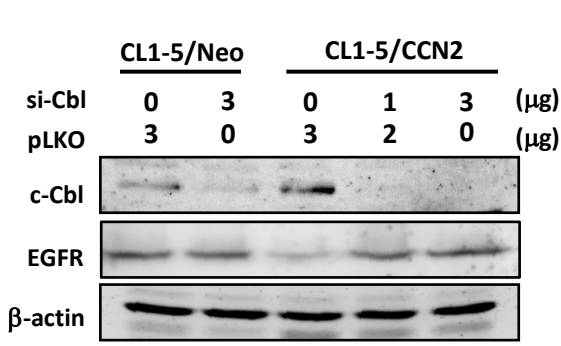

Figure.S7

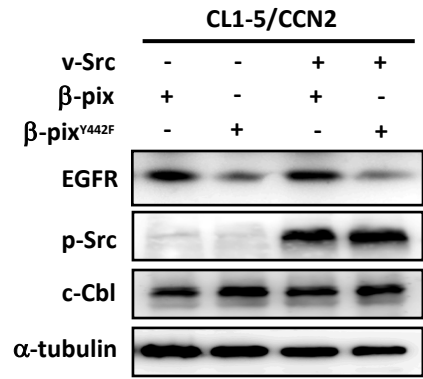

Figure.S8

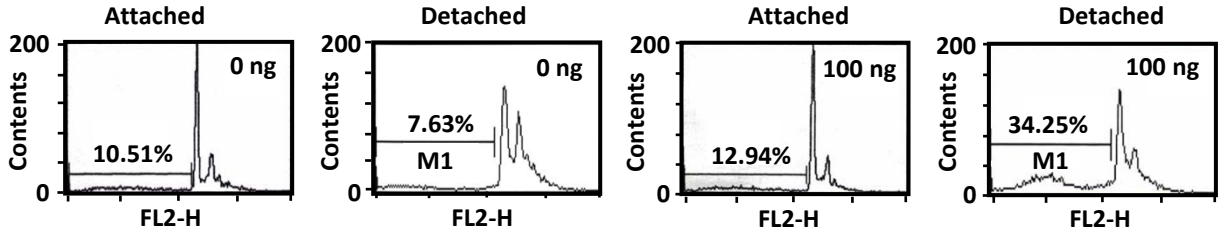

Figure.S9

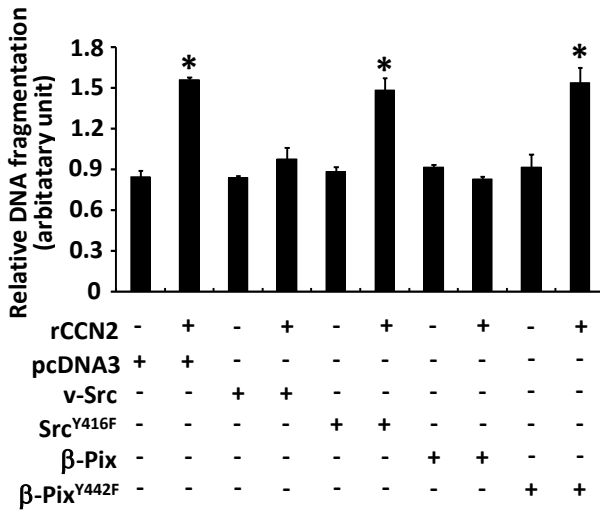

Figure.S10

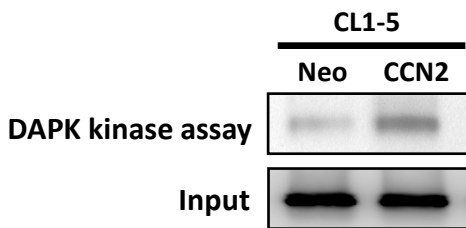

Figure.S12

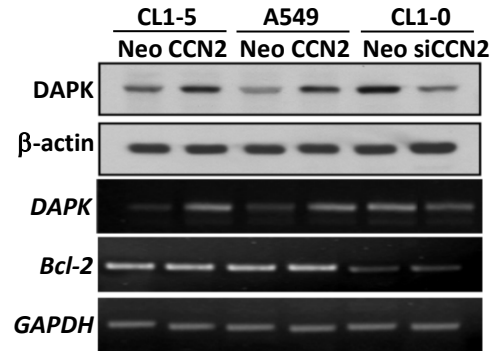

Figure.S11

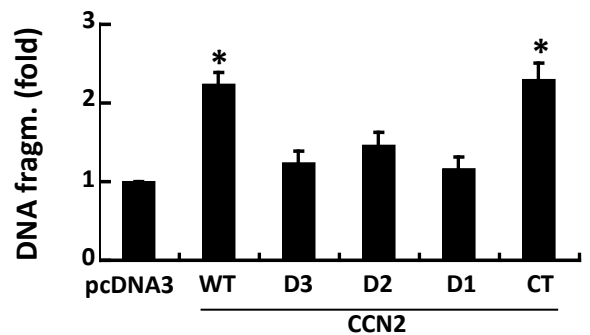

Figure.S13

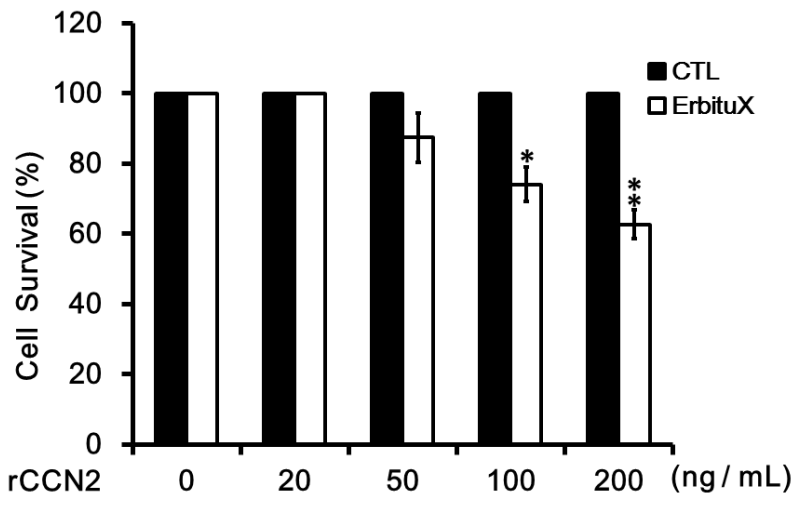

**Figure.S14**
